# Supplementary material for: Implementation of a Mobile Health Approach to a Long-Lasting Insecticidal Net Uptake Intervention for Malaria Prevention Among Pregnant Women in Tanzania: Process Evaluation of the Hati Salama (HASA) Randomized Controlled Trial Study
Source: J Med Internet Res. 2024 Nov 5;26:e51527. doi: 10.2196/51527 (PMC11576607; doi:10.2196/51527)
Supplement: Multimedia Appendix 1 [file jmir_v26i1e51527_app1.docx]

**Table S1.** Nurse follow-up survey questions (translated from Swahili to English).

|  | Preset question content |
| --- | --- |
| 1 | Did you find HASAa to be helpful in improving the overall perception and understanding of malaria and the importance of prevention? Both with regards to the bed net component, as well as messages? |
| 2 | Do you find that this is a program that your community needs? |
| 3 | Do you find that your patients were eager to and easily able to redeem a net? |
| 4a | Do you find that the workflow (to issue vouchers) was easy to understand and follow? |
| 4b | If not, what would you change? |
| 5 | Did you find the training sessions and on-the-ground support adequate? |
| 6a | Did you encounter challenges with regard to network or connectivity when issuing vouchers? |
| 6b | If so, did this affect the number of vouchers you issued or redemption by beneficiaries? |
| 7 | Considering your catchment population, was it challenging to register women with phones? |
| 8a | Did you find that using a proxy phone was helpful? |
| 8b | Did you encounter challenges with finding a reliable proxy phone? |
| 9 | Did you find that your involvement in HASA increased your workload heavily? |
| 10 | Do you think it would have been helpful to have had more nurses trained as issuers in your facility? |
| 11 | In a potential scale-up, what are your recommendations for improving the program? |

aHASA: Hati Salama.

**Table S2.** Participant follow-up survey answer options (translated from Swahili to English).

|  | Preset answer content |
| --- | --- |
| 1 | I lost my voucher number |
| 2 | My voucher number was not valid when I took it to the shop |
| 3 | I went to redeem the voucher and the store had no nets available |
| 4 | I do not want a net |
| 5 | I have all the bed nets I need |
| 6 | I cannot afford to pay the additional payment for the net |
| 7 | I do not live close enough to the shops that are in the Hati Punguzo program |
| 8 | I went to the shop, but the shopkeeper failed to use the e-voucher system |
| 9 | Other reason (open-ended response) |
